# Supplementary material
Source: PubMed Central journal article supplement (PMC1242318)

**Subunit A****Subunit B**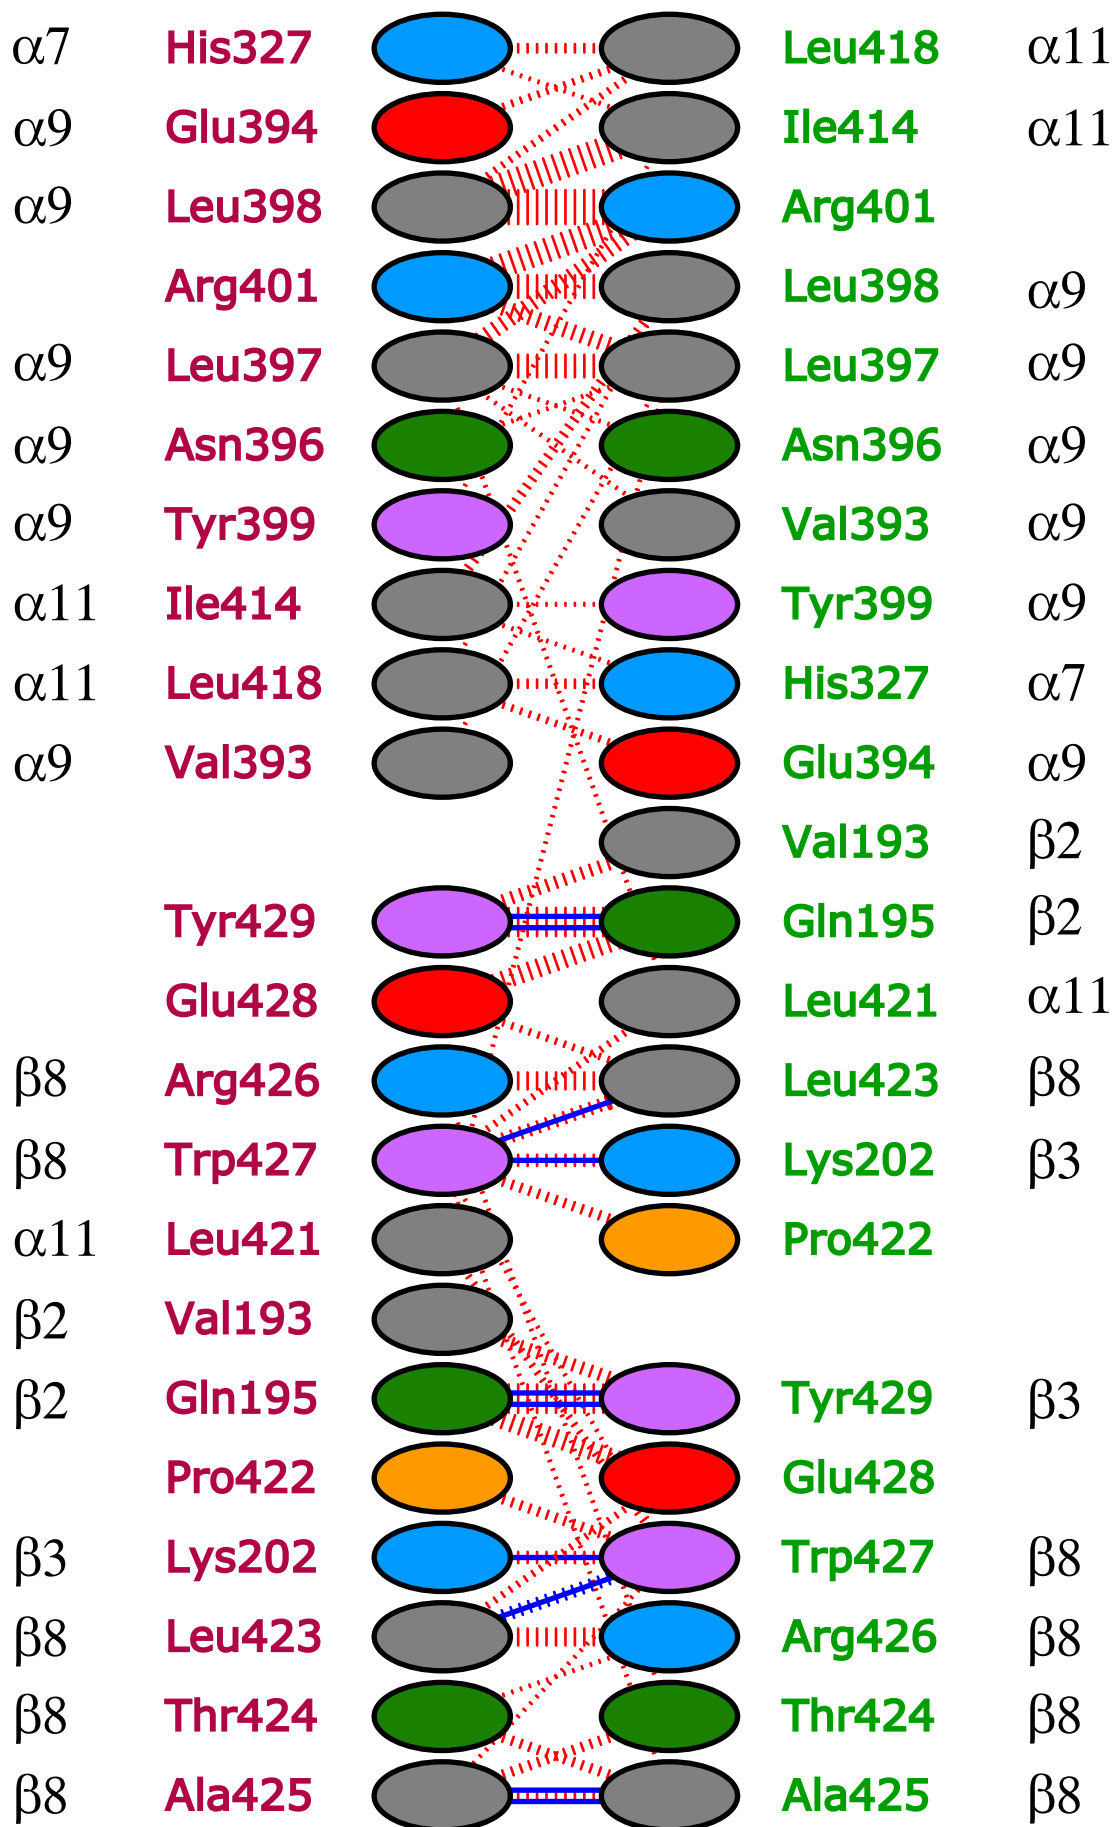

Supplement: pnas_0506557102_1.pdf [file pnas_0506557102_1.pdf]

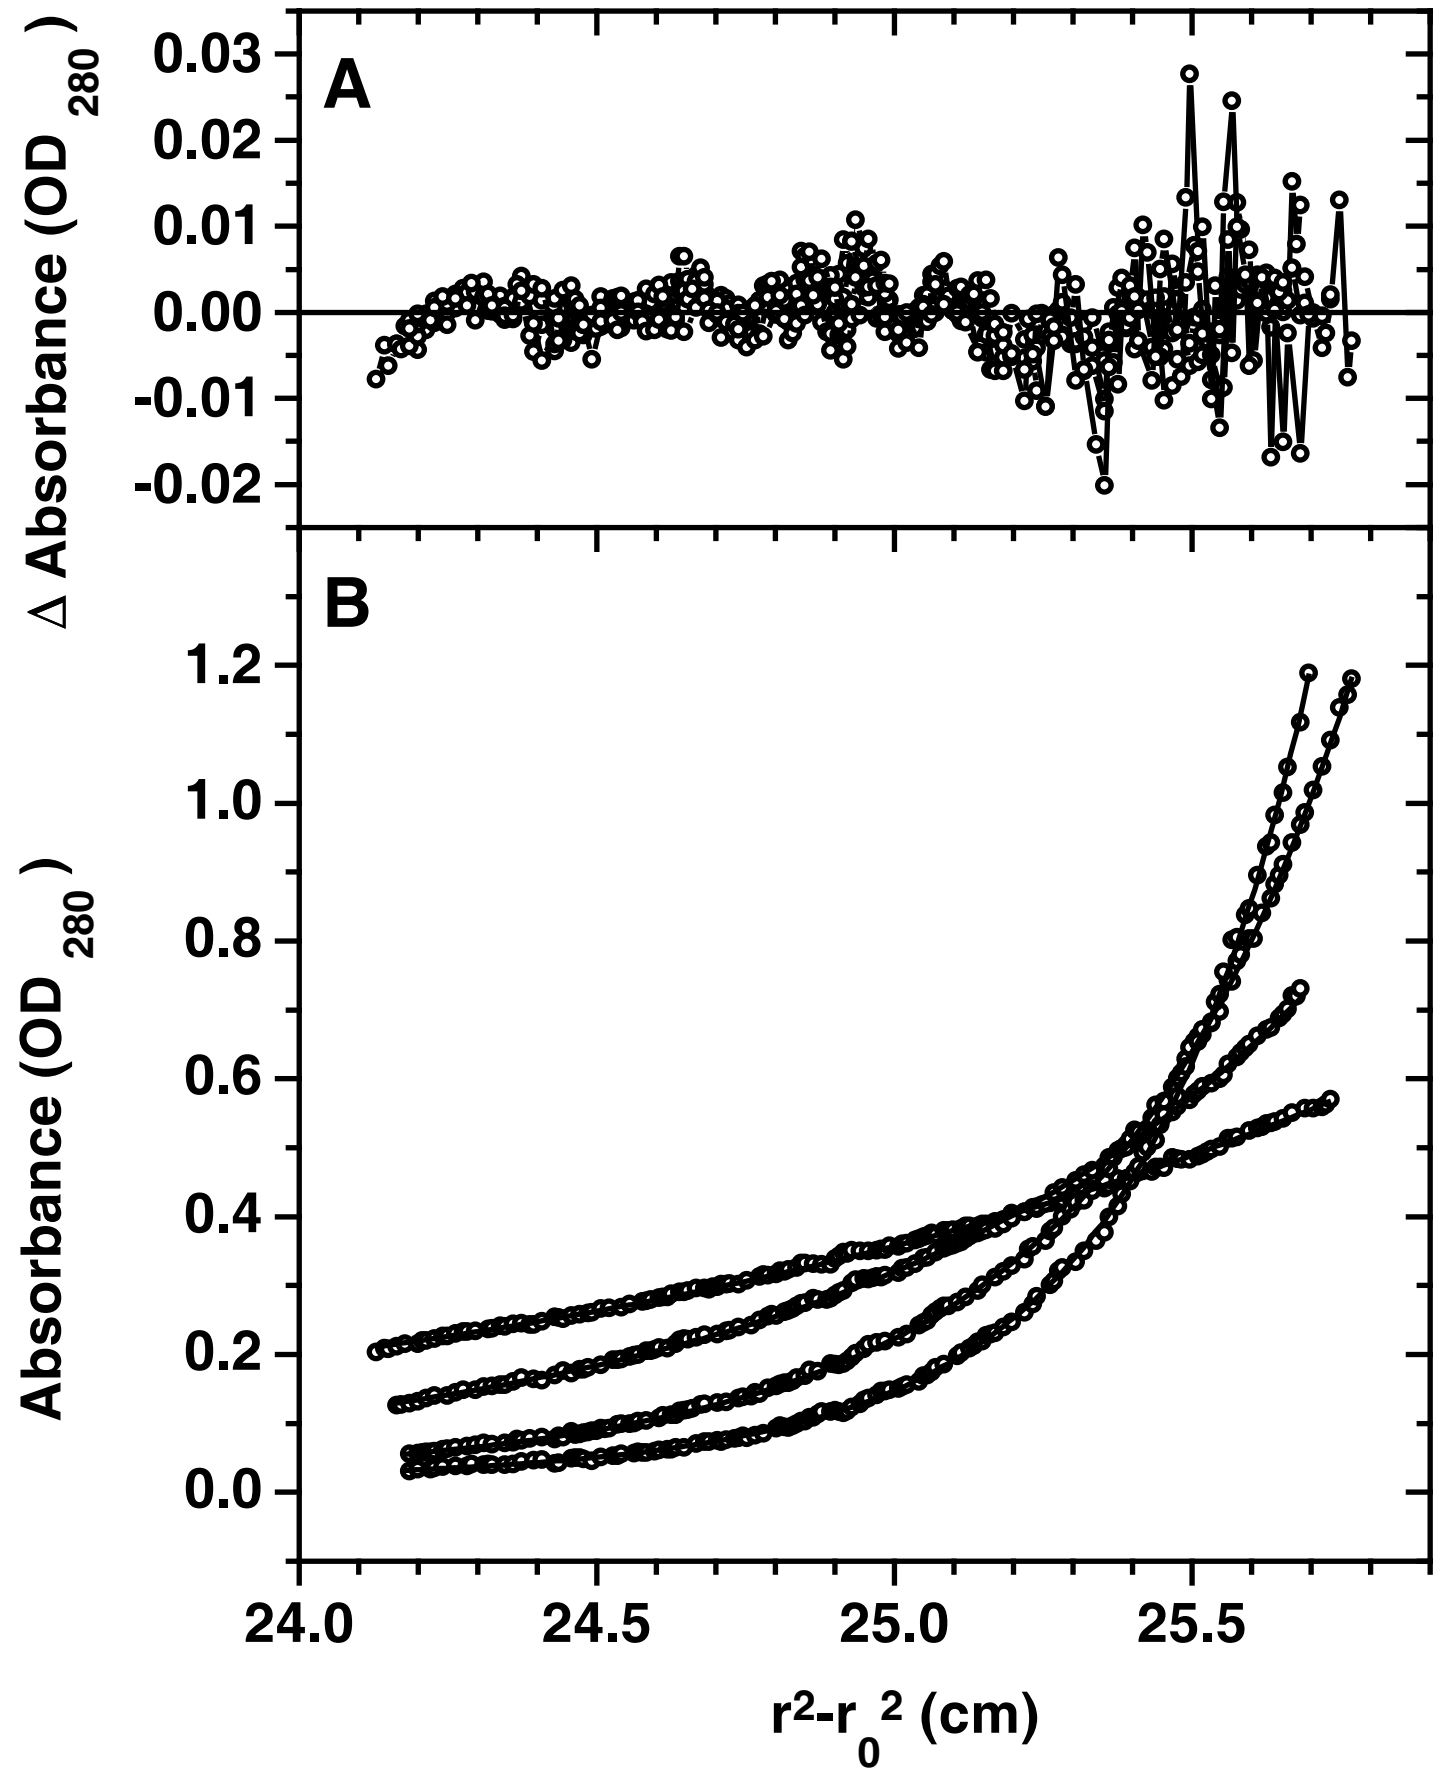

Supplement: pnas_0506557102_2.pdf [file pnas_0506557102_2.pdf]

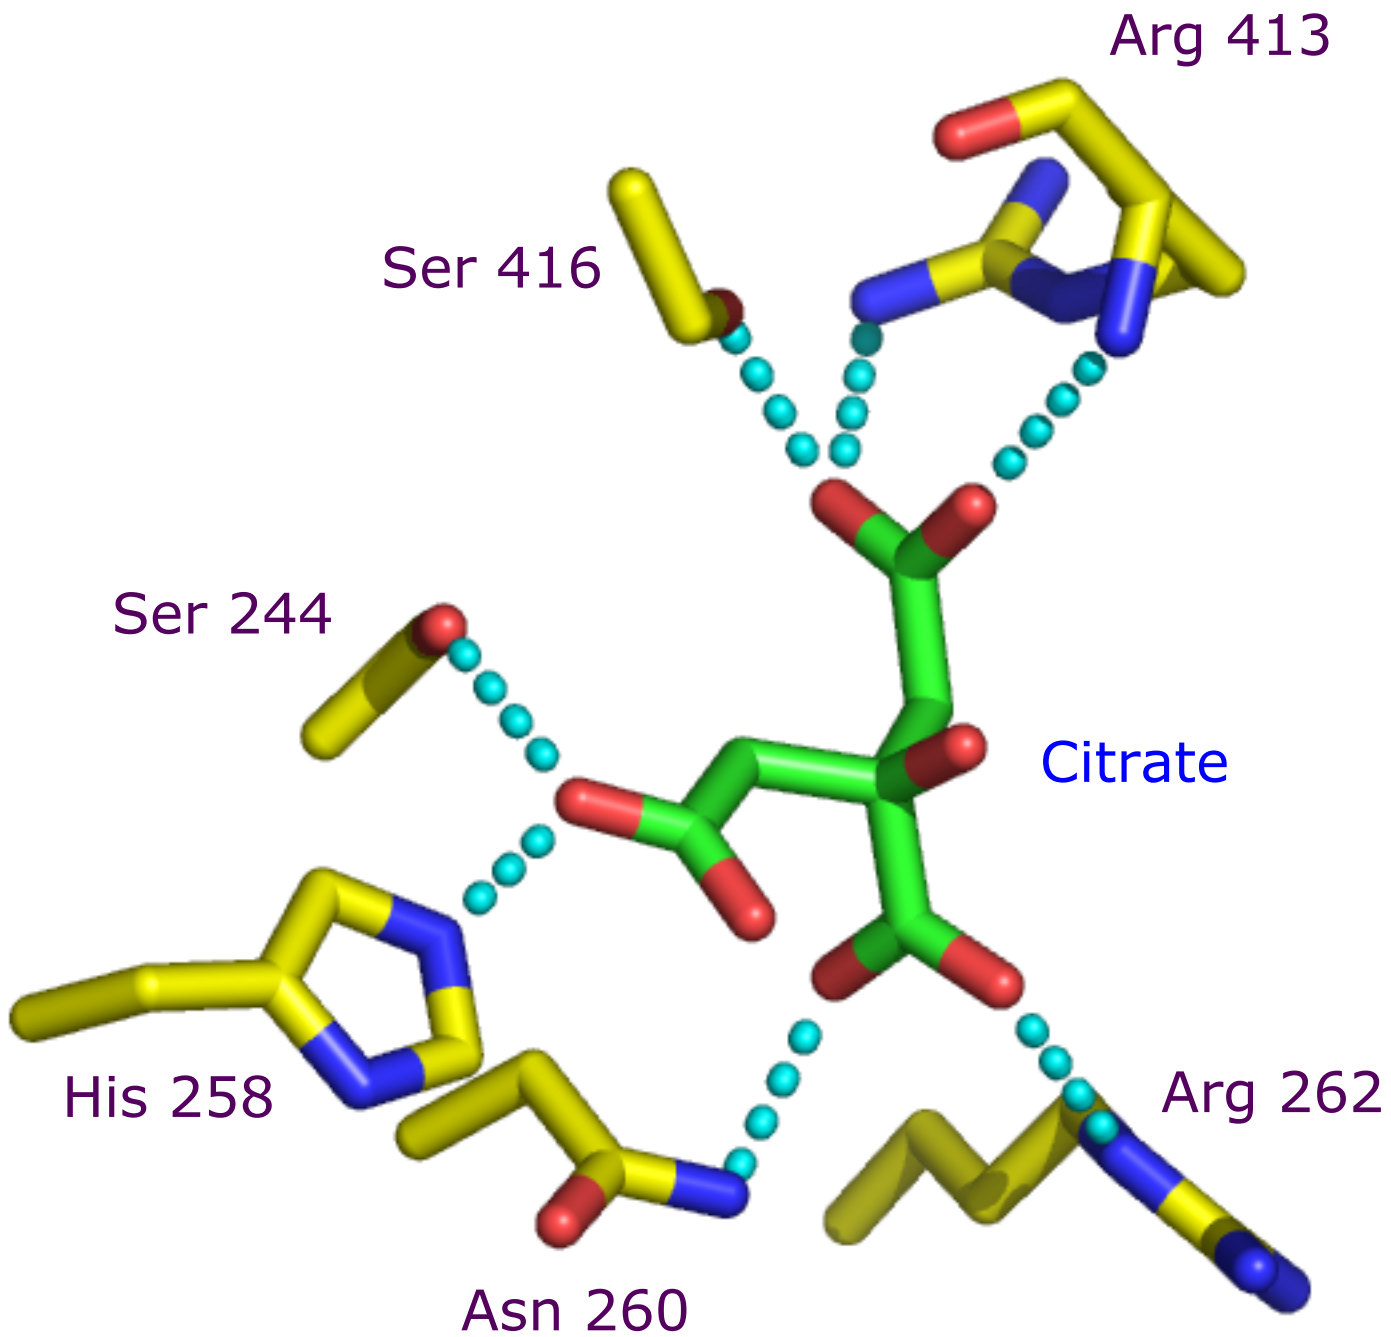

Supplement: pnas_0506557102_3.pdf [file pnas_0506557102_3.pdf]

Reorienting Cleft

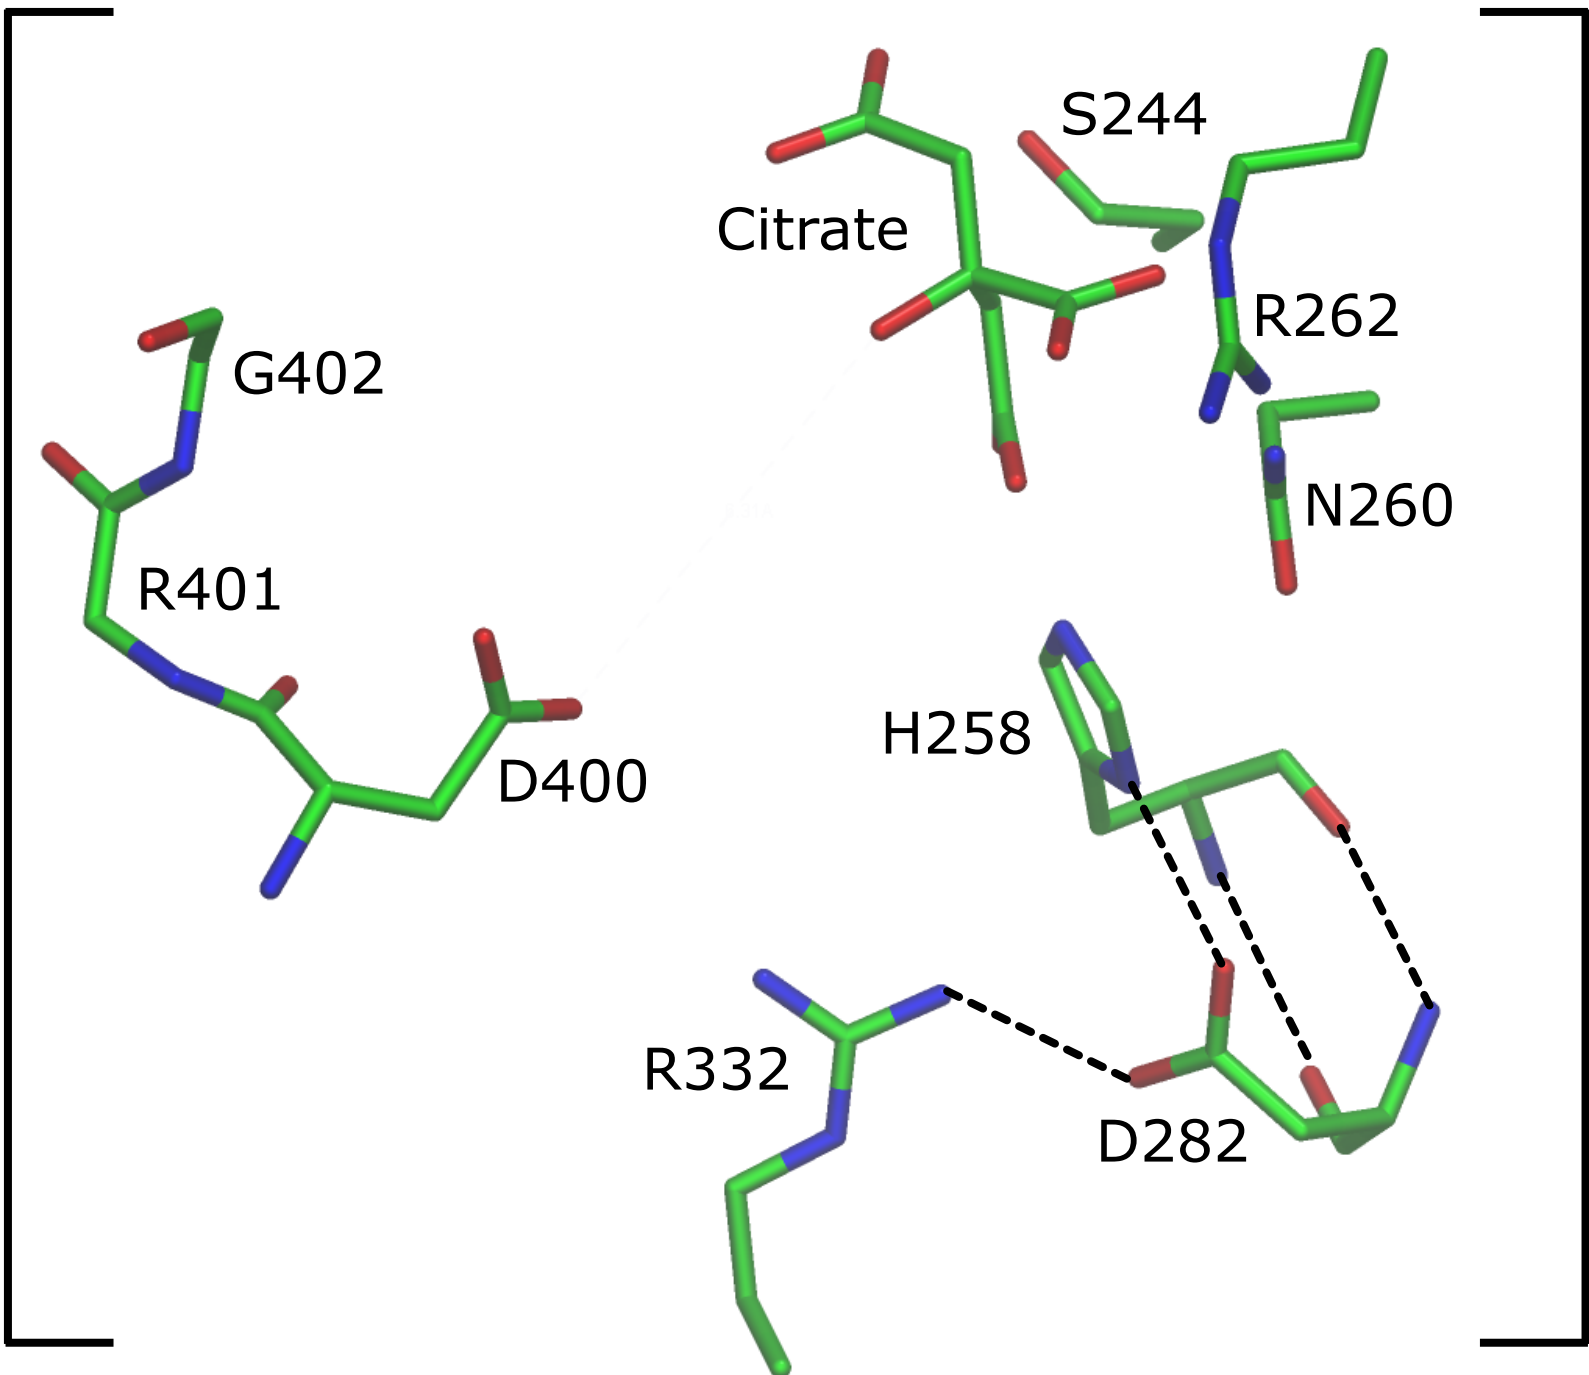

Citrate

S244

R262

N260

G402

R401

D400

H258

R332

D282

Decarboxylation Corridor

Supplement: pnas_0506557102_4.pdf [file pnas_0506557102_4.pdf]

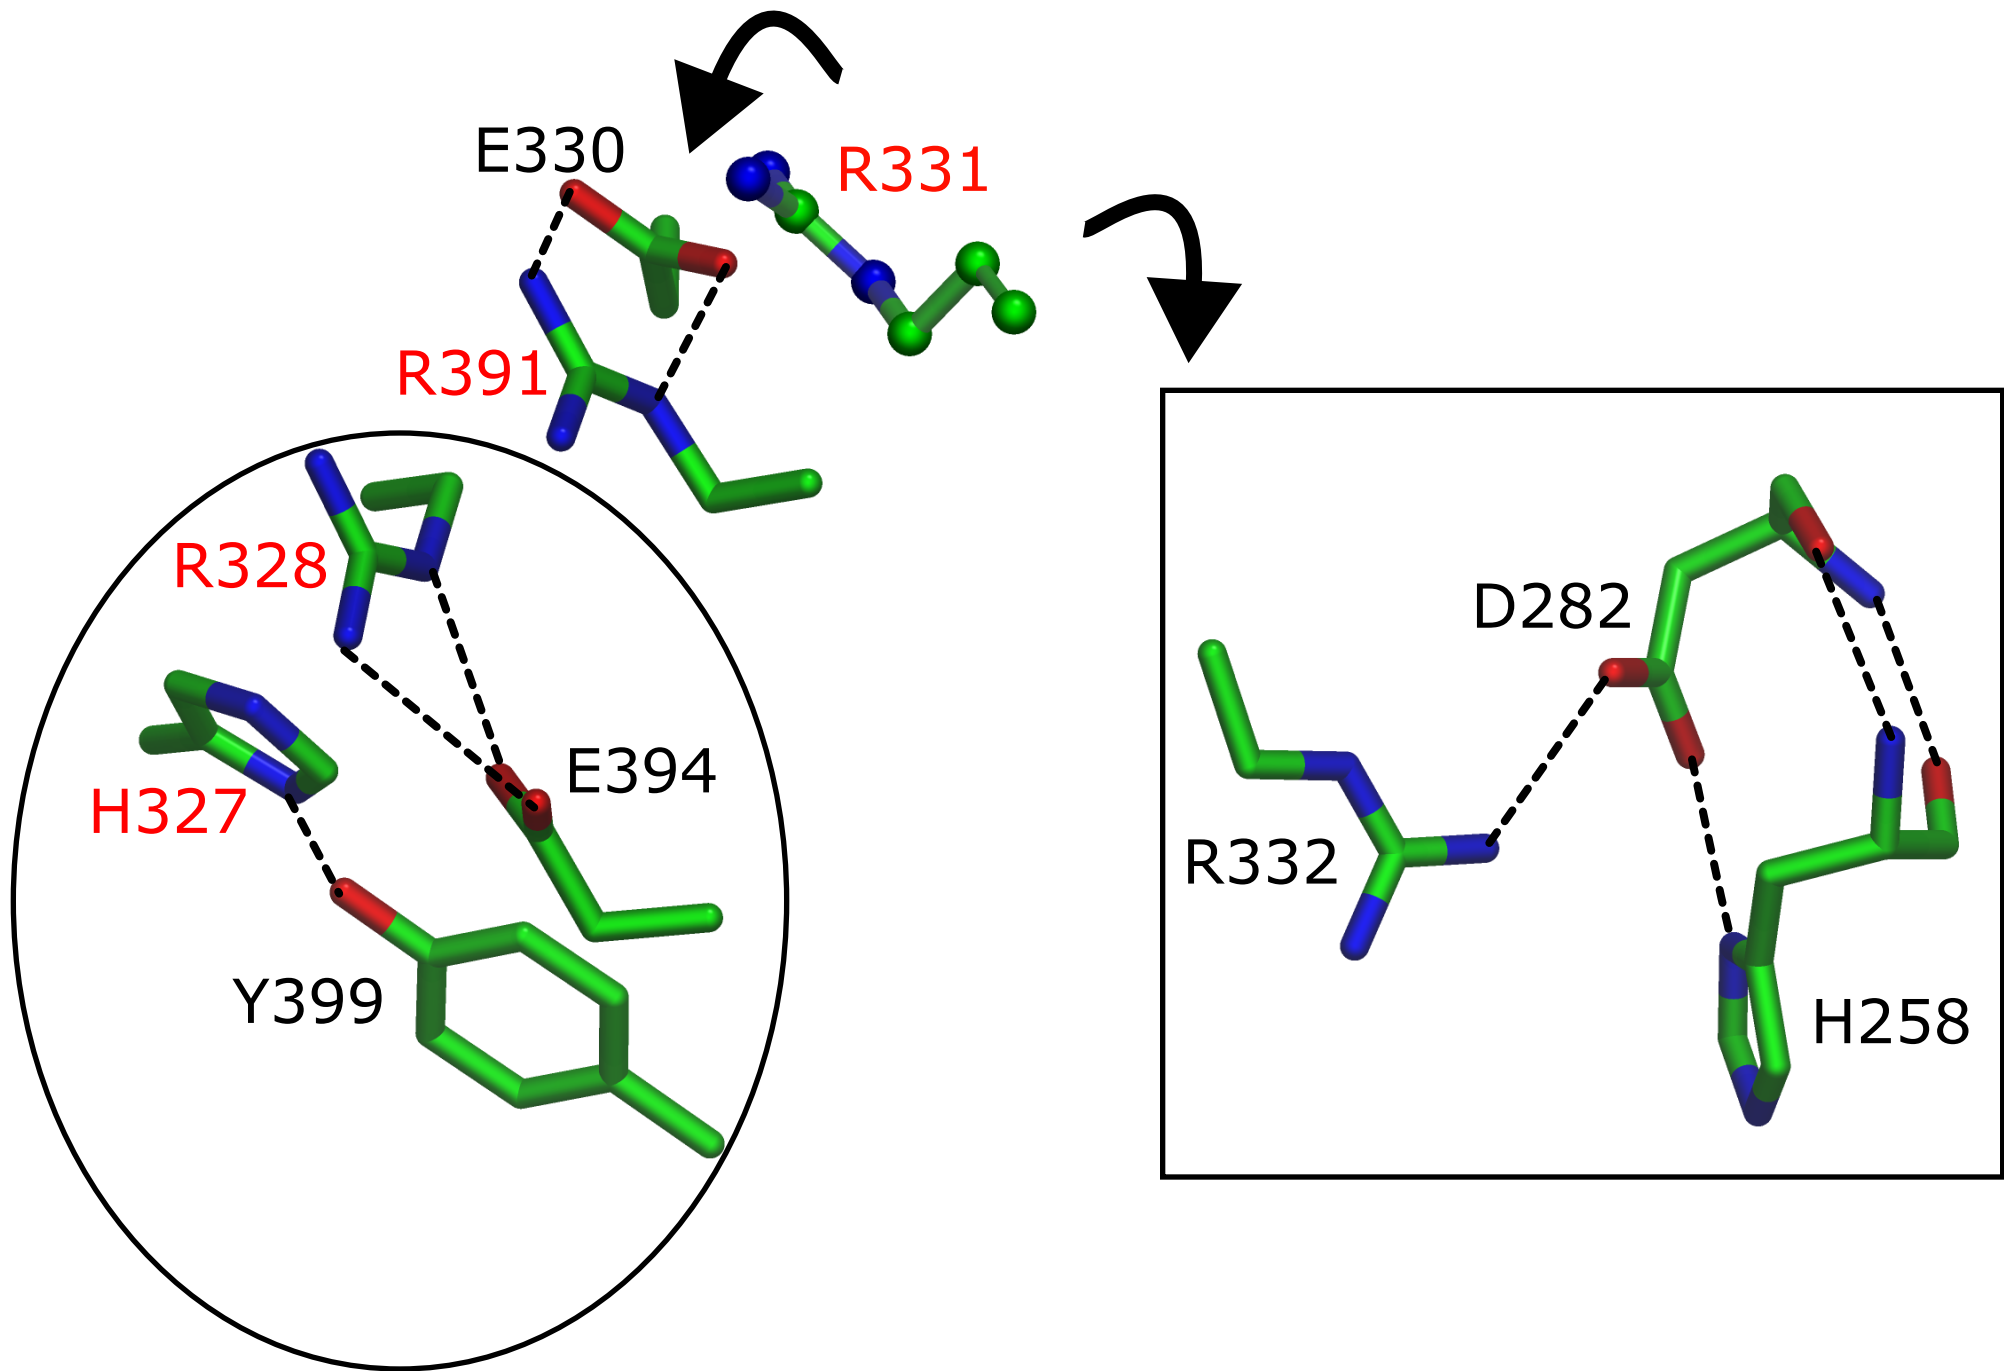

Supplement: pnas_0506557102_5.pdf [file pnas_0506557102_5.pdf]
